# Supplementary material for: Identification of epigenetic modulators as determinants of nuclear size and shape
Source: eLife. 2023 May 23;12:e80653. doi: 10.7554/eLife.80653 (PMC10259489; doi:10.7554/eLife.80653)
Supplement: Supplementary file 1. — (A) lists the genes targeted in the screen. (B) is a file describing the plasmids generated during this study. (C) lists the antibodies used in this study. (D) is a comparative list of nuclear shape Z-score, nuclear shape raw score, nuclear area, and nuclear perimeter measurements. [file elife-80653-supp1.xlsx]

## Sheet: Supplmentary File 1A
Supplementary File 1A: Target gene list
GeneID	GeneSymbol		GeneID	GeneSymbol		GeneID	GeneSymbol		GeneID	GeneSymbol		GeneID	GeneSymbol		GeneID	GeneSymbol		GeneID	GeneSymbol		GeneID	GeneSymbol		GeneID	GeneSymbol
30	ACAA1		3937	LCP2		6890	TAP1		9575	CLOCK		11176	BAZ2A		27044	SND1		55632	KIAA1333		79828	METTL8		116143	WDR92
60	ACTB		4000	LMNA		6917	TCEA1		9611	NCOR1		11177	BAZ1A		27097	TAF5L		55636	CHD7		79831	JMJD5		116173	CMTM5
86	ACTL6A		4001	LMNB1		6941	TCF19		9612	NCOR2		11198	SUPT16H		27125	AFF4		55662	HIF1AN		79885	HDAC11		117143	TADA1L
88	ACTN2		4012	LNPEP		6942	TCF20		9631	NUP155		11240	PADI2		27127	SMC1B		55676	SLC30A6		79902	NUP85		121536	AEBP2
89	ACTN3		4085	MAD2L1		6996	TDG		9646	CTR9		11262	SP140		27154	BRPF3		55677	IWS1		79903	NAA60		122402	TDRD9
142	PARP1		4152	MBD1		6999	TDO2		9678	PHF14		11270	NRM		27230	SERP1		55683	KIAA1310		79913	ACTR5		123169	LEO1
309	ANXA6		4174	MCM5		7108	TM7SF2		9682	KDM4A		11284	PNKP		27238	GPKOW		55693	KDM4D		79918	SETD6		124359	CDYL2
326	AIRE		4204	MECP2		7112	TMPO		9688	NUP93		11332	ACOT7		27243	CHMP2A		55706	TMEM48		79960	PHF17		126668	TDRD10
408	ARRB1		4221	MEN1		7158	TP53BP1		9730	VPRBP		11335	CBX3		27314	RAB30		55717	BRWD2		79969	C6orf134		128817	CSTL1
444	ASPH		4236	MFAP1		7172	TPMT		9734	HDAC9		11343	MGLL		27348	TOR1B		55746	NUP133		80012	PHC3		128866	CHMP4B
472	ATM		4255	MGMT		7175	TPR		9739	SETD1A		22823	MTF2		27349	MCAT		55777	MBD5		80152	CENPT		129401	NUP35
545	ATR		4297	MLL		7272	TTK		9748	SLK		22845	DOLK		27443	CECR2		55806	HR		80205	CHD9		138151	NACC2
546	ATRX		4299	AFF1		7290	HIRA		9757	KMT2B		22895	RPH3A		29028	ATAD2		55818	JMJD1A		80218	NAA50		138474	TAF1L
639	PRDM1		4302	MLLT6		7319	UBE2A		9759	HDAC4		22908	SACM1L		29058	TMEM230		55848	C9orf46		80301	PLEKHO2		140690	CTCFL
648	BMI1		4591	TRIM37		7320	UBE2B		9767	PHF16		22933	SIRT2		29072	SETD2		55850	USE1		80312	TET1		140732	SUN5
675	BRCA2		4600	MX2		7324	UBE2E1		9810	RNF40		22955	SCMH1		29082	CHMP4A		55869	HDAC8		80314	EPC1		140836	BANF2
676	BRDT		4616	GADD45B		7329	UBE2I		9818	NUPL1		22976	PAXIP1		29095	ORMDL2		55870	ASH1L		80335	WDR82		143241	DYDC1
699	BUB1		4644	MYO5A		7334	UBE2N		9866	TRIM66		22992	FBXL11		29117	BRD7		55898	UNC45A		80342	TRAF3IP3		143884	CWF19L2
701	BUB1B		4665	NAB2		7341	SUMO1		9869	SETDB1		23013	SPEN		29128	UHRF1		55904	KMT2E		80349	WDR61		144404	TMEM120B
706	TSPO		4673	NAP1L1		7348	UPK1B		9870	AREL1		23028	AOF2		29774			55929	DMAP1		80816	ASXL3		147007	TMEM199
931	MS4A1		4674	NAP1L2		7403	UTX		9883	POM121		23030	JMJD2B		29781	NCAPH2		56163	RNF17		80853	JHDM1D		147991	DPY19L3
953	ENTPD1		4675	NAP1L3		7404	UTY		9913	SUPT7L		23030	KDM4B		29843	SENP1		56164	STK31		80854	SETD7		148479	PHF13
983	CDC2		4927	NUP88		7443	VRK1		9918	NCAPD2		23047	PDS5B		29943	PADI1		56165	TDRD1		81550	TDRD3		148581	UBE2U
991	CDC20		4928	NUP98		7466	WFS1		9926	LPGAT1		23063	WAPAL		29947	DNMT3L		56254	RNF20		81565	NDEL1		150572	SMYD1
1017	CDK2		4998	ORC1L		7468	WHSC1		9958	USP15		23067	SETD1B		29994	BAZ2B		56262	LRRC8A		81671	TMEM49		151194	FAM119A
1059	CENPB		5002	SLC22A18		7514	XPO1		9960	USP3		23081	JMJD2C		30827	CXXC1		56341	PRMT8		81929	SEH1L		151393	FAM82A1
1105	CHD1		5110	PCMT1		7586	ZKSCAN1		9972	NUP153		23133	PHF8		50810	HDGFRP3		56895	AGPAT4		83590	TMUB1		151636	DTX3L
1106	CHD2		5111	PCNA		7703	PCGF2		10013	HDAC6		23135	KDM6B		51009	DERL2		56926	NCLN		83746	L3MBTL2		151648	SGOL1
1107	CHD3		5119	CHMP1A		7726	TRIM26		10014	HDAC5		23137	SMC5		51026	GOLT1B		56943	ENY2		83852	SETDB2		152098	ZCWPW2
1108	CHD4		5252	PHF1		7799	PRDM2		10036	CHAF1A		23165	NUP205		51097	SCCPDH		56950	SMYD2		83860	TAF3		154150	HDGFL1
1111	CHEK1		5253	PHF2		7862	BRPF1		10038	PARP2		23204	ARL6IP1		51105	PHF20L1		56970	ATXN7L3		83862	TMEM120A		154807	VKORC1L1
1312	COMT		5337	PLD1		7874	USP7		10051	SMC4		23210	JMJD6		51111	SUV420H1		56978	PRDM8		83903	GSG2		157753	TMEM74
1386	ATF2		5355	PLP2		7994	MYST3		10054	UBA2		23224	SYNE2		51131	PHF11		56979	PRDM9		83933	HDAC10		158358	KIAA2026
1387	CREBBP		5431	POLR2B		8019	BRD3		10075	HUWE1		23225	NUP210		51147	ING4		56980	PRDM10		84065	TMEM222		158880	USP51
1468	SLC25A10		5562	PRKAA1		8021	NUP214		10098	TSPAN5		23244	PDS5A		51225	ABI3		56981	PRDM11		84102	SLC41A2		160418	TMTC3
1487	CTBP1		5563	PRKAA2		8028	MLLT10		10155	TRIM28		23246	BOP1		51230	PHF20		57062	DDX24		84108	PCGF6		161176	SYNE3
1488	CTBP2		5573	PRKAR1A		8085	MLL2		10159	ATP6AP2		23279	NUP160		51317	PHF21A		57085	AGTRAP		84148	MYST1		163183	SYNE4
1642	DDB1		5578	PRKCA		8086	AAAS		10162	LPCAT3		23304	UBR2		51322	WAC		57117	INTS12		84181	CHD6		163589	TDRD5
1643	DDB2		5579	PRKCB		8110	DPF3		10195	ALG3		23306	TMEM194A		51337	THEM6		57122	NUP107		84193	SETD3		163590	TOR1AIP2
1647	GADD45A		5580	PRKCD		8165	AKAP1		10196	PRMT3		23309	SIN3B		51343	FZR1		57132	CHMP1B		84233	TMEM126A		165918	RNF168
1786	DNMT1		5585	PKN1		8193	DPF1		10228	STX6		23310	NCAPD3		51412	ACTL6B		57136	APMAP		84236	RHBDD1		170394	PWWP2B
1787	TRDMT1		5630	PRPH		8202	NCOA3		10237	SLC35B1		23326	USP22		51426	POLK		57142	RTN4		84261	FBXW9		170575	GIMAP1
1788	DNMT3A		5685	PSMA4		8208	CHAF1B		10269	ZMPSTE24		23335	WDR7		51460	SFMBT1		57222	ERGIC1		84289	ING5		171023	ASXL1
1789	DNMT3B		5879	RAC1		8242	JARID1C		10274	STAG1		23338	PHF15		51510	CHMP5		57325	CSRP2BP		84295	PHF6		196483	FAM86A
1911	PHC1		5885	RAD21		8243	SMC1A		10282	BET1		23339	VPS39		51522	TMEM14C		57332	CBX8		84312	BRMS1L		196541	METTL21C
1912	PHC2		5896	RAG1		8284	JARID1D		10285	SMNDC1		23345	SYNE1		51533	PHF7		57337	SENP7		84332	DYDC2		199953	TMEM201
1962	EHHADH		5897	RAG2		8289	ARID1A		10313	RTN3		23353	UNC84A		51547	SIRT7		57338	JPH3		84333	PCGF5		200424	TET3
2010	EMD		5902	RANBP1		8295	TRRAP		10318	TNIP1		23397	NCAPH		51548	SIRT6		57462	KIAA1161		84444	DOT1L		201254	STRA13
2033	EP300		5903	RANBP2		8314	BAP1		10322	SMYD5		23399	DULLARD		51564	HDAC7		57504	MTA3		84456	L3MBTL3		201562	PTPLB
2073	ERCC5		5905	RANGAP1		8359	HIST1H4A		10336	PCGF3		23408	SIRT5		51588	PIAS4		57552	AADACL1		84522	JAGN1		203547
2091	FBL		5926	ARID4A		8379	MAD1L1		10376	TUBA1B		23409	SIRT4		51592	TRIM33		57634	EP400		84619	ZGPAT		205564	SENP5
2122	EVI1		5927	KDM5A		8417	STX7		10384	BTN3A3		23410	SIRT3		51652	VPS24		57649	PHF12		84656			221037	JMJD1C
2138	EYA1		5928	RBBP4		8450	CUL4B		10389	SCML2		23411	SIRT1		51669	TMEM66		57661	PHRF1		84661	DPY30		221400	TDRD6
2139	EYA2		5929	RBBP5		8464	SUPT3H		10419	PRMT5		23424	TDRD7		51702	PADI3		57673	BEND3		84678	KDM2B		221496	LEMD2
2140	EYA3		5931	RBBP7		8467	SMARCA5		10445	MCRS1		23429	RYBP		51720	UIMC1		57680	CHD8		84717	HDGFRP2		221656	KDM1B
2145	EZH1		5977	DPF2		8473	OGT		10447	FAM3C		23439	ATP1B4		51742	ARID4B		57713	SFMBT2		84733	CBX2		253635	CCDC75
2146	EZH2		5987	TRIM27		8480	RAE1		10474	TADA3		23466	CBX6		51773	RSF1		58508	KMT2C		84759	PCGF1		254013	C12orf72
2186	BPTF		6015	RING1		8520	HAT1		10490	VTI1B		23468	CBX5		51780	KDM3B		59335	PRDM12		84787	SUV420H2		254065	BRWD3
2222	FDFT1		6045	RNF2		8535	CBX4		10498	CARM1		23469	PHF3		53371	NUP54		59336	PRDM13		84790	TUBA1C		254359	ZDHHC24
2280	FKBP1A		6046	BRD2		8554	PIAS1		10524	KAT5		23476	BRD4		53615	MBD3		59343	SENP2		84814	PPAPDC3		255043	TMEM86B
2286	FKBP2		6119	RPA3		8648	NCOA1		10567	RABAC1		23492	CBX7		54014	BRWD1		60343	FAM3A		84823	LMNB2		255330	C3orf46
2289	FKBP5		6299	SALL1		8681	JMJD7-PLA2G4B		10569	SLU7		23511	NUP188		54093	SETD4		63925	ZNF335		84844	PHF5A		256380	SCML4
2332	FMR1		6304	SATB1		8721	EDF1		10592	SMC2		23512	SUZ12		54454	ATAD2B		63976	PRDM16		84864	MINA		256979	SUN3
2542	SLC37A4		6314	ATXN7		8726	EED		10600	USP16		23516	SLC39A14		54475	NLE1		63977	PRDM15		84912	SLC35B4		257218	SHPRH
2590	GALNT2		6396	SEC13		8760	CDS2		10629	TAF6L		23522	KAT6B		54491	FAM105A		63978	PRDM14		84928	TMEM209		283238	SLC22A24
2648	KAT2A		6419	SETMAR		8794	TNFRSF10C		10664	CTCF		23569	PADI4		54496	PRMT7		64091	POPDC2		84939	MUM1		284058	KIAA1267
2705	GJB1		6500	SKP1		8805	TRIM24		10668	CGRRF1		23592	LEMD3		54556	ING3		64151	NCAPG		84975	MFSD5		285877
2733	GLE1		6515	SLC2A3		8815	BANF1		10734	STAG3		23613	ZMYND8		54617	INO80		64324	NSD1		85365	ALG2		339123	JMJD8
2956	MSH6		6548	SLC9A1		8834	TMEM11		10735	STAG2		23633	KPNA6		54623	PAF1		64327	LMBR1		90268	FAM105B		340061	TMEM173
2959	GTF2B		6594	SMARCA1		8841	HDAC3		10743	RAI1		23636	NUP62		54708	2022-03-05		64426	SUDS3		90407	TMEM41A		348801	LNP1
2962	GTF2F1		6595	SMARCA2		8850	KAT2B		10762	NUP50		23673	STX12		54737	MPHOSPH8		64431	ACTR6		90523	C6orf142		348995	NUP43
2965	GTF2H1		6596	HLTF		8878	SQSTM1		10765	KDM5B		23774	BRD1		54790	TET2		64598	MOSPD3		90523	MLIP		353238	PADI6
3015	H2AFZ		6597	SMARCA4		8930	MBD4		10771	ZMYND11		23780	APOL2		54799	MBTD1		64754	SMYD3		90701	SEC11C		373509	USP50
3054	HCFC1		6598	SMARCB1		8932	MBD2		10847	SRCAP		25777	SUN2		54830	NUP62CL		64755	C16orf58		90780	PYGO2		375056	MIA3
3055	HCK		6599	SMARCC1		8972	MGAM		10857	PGRMC1		25840	METTL7A		54867	TMEM214		65094	JMJD4		90826	PRMT10		387103	C6orf173
3065	HDAC1		6601	SMARCC2		8986	RPS6KA4		10867	TSPAN9		25855	BRMS1		54880	BCOR		65980	BRD9		91133	L3MBTL4		387893	SETD8
3066	HDAC2		6602	SMARCD1		9025	RNF8		10890	RAB10		25862	USP49		54892	NCAPG2		65991	FUNDC2		91181	NUP210L		390245
3068	HDGF		6604	SMARCD3		9031	BAZ1B		10891	PPARGC1A		25909	AHCTF1		54904	WHSC1L1		79001	VKORC1		91646	TDRD12		400966	RGPD1
3070	HELLS		6605	SMARCE1		9063	PIAS2		10902	BRD8		25942	SIN3A		54934	C12orf41		79023	NUP37		91782	CHMP7		401265	KLHL31
3229	HOXC13		6612	SUMO3		9070	ASH2L		10919	EHMT2		25972	UNC50		54947	LPCAT2		79041	TMEM38A		92421	CHMP4C		642636
3275	PRMT2		6613	SUMO2		9112	MTA1		10933	MORF4L1		25978	CHMP2B		54968	TMEM70		79053	ALG8		92822	ZNF276		729857	RGPD2
3276	PRMT1		6672	SP100		9126	SMC3		10943	MSL3		25988	HINFP		55023	PHIP		79073	TMEM109		92840	REEP6		100101267	POM121C
3431	SP110		6749	SSRP1		9129	PRPF3		10948	STARD3		26007	DAK		55063	ZCWPW1		79139	DERL1		93081	C13orf27		100137047	JMJD7
3621	ING1		6790	AURKA		9212	AURKB		10951	CBX1		26013	L3MBTL		55080	TAPBPL		79142	PHF23		93166	PRDM6
3622	ING2		6795	AURKC		9219	MTA2		10970	CKAP4		26038	CHD5		55139	ANKZF1		79152	FA2H		93349	SP140L
3684	ITGAM		6801	STRN		9252	RPS6KA5		10982	MAPRE2		26054	SENP6		55140	ELP3		79184	BRCC3		93380	MMGT1
3687	ITGAX		6810	STX4		9317	PTER		11000	SLC27A3		26092	TOR1AIP1		55148	UBR7		79188	TMEM43		93611	FBXO44
3703	STT3A		6811	STX5		9329	GTF3C4		11022	TDRKH		26108	PYGO1		55151	TMEM38B		79415	C17orf62		93624
3717	JAK2		6839	SUV39H1		9341	VAMP3		11083	DIDO1		26122	EPC2		55170	PRMT6		79577	CDC73		93973	ACTR8
3720	JARID2		6843	VAMP1		9425	CDYL		11091	WDR5		26147	PHF19		55193	PBRM1		79595	SAP130		94026	POM121L2
3799	KIF5B		6844	VAMP2		9426	CDY2A		11097	NUPL2		26168	SENP3		55209	SETD5		79609	METTL21D		112869	CCDC101
3836	KPNA1		6856	SYPL1		9482	STX8		11105	PRDM7		26502	NARF		55252	ASXL2		79643	CHMP6		112885	PHF21B
3838	KPNA2		6871	TADA2A		9499	MYOT		11107	PRDM5		26578	OSTF1		55266	TMEM19		79663	HSPBAP1		113130	CDCA5
3839	KPNA3		6872	TAF1		9513	FXR2		11108	PRDM4		26610	ELP4		55274	PHF10		79677	SMC6		114803	MYSM1
3840	KPNA4		6877	TAF5		9524	TECR		11143	MYST2		26984	SEC22A		55340	GIMAP5		79697	C14orf169		114822	RHPN1
3895	KTN1		6880	TAF9		9554	SEC22B		11160	ERLIN2		26993	AKAP8L		55352	C17orf79		79723	SUV39H2		114826	SMYD4
3912	LAMB1		6881	TAF10		9557	CHD1L		11161	C14orf1		26998	FETUB		55585	UBE2Q1		79813	EHMT1		114882	OSBPL8
3930	LBR		6883	TAF12		9570	GOSR2		11168	PSIP1		27005	USP21		55627	SMPD4		79823	C2orf34		115290	FBXO17

## Sheet: Supplmentary File 1B
Supplementary File 1B: Plasmids used in this study
In vitro protein expression plasmids
Plasmid Name:	Content:			Cloning Sites:
pACS34	GST (PGEX4T1)
pACS45	GST-lamin A (389-646)			BAMHI/ECORI
pACS57	GST-lamin C (389-572)			BAMHI/XHOI
pACS58	GST-lamin A (565-646)			BAMHI/ECORI
pACS69	GST-lamin A (389-566)			BAMHI/ECORI
pACS77	GST-lamin A (389-638)			BAMHI/ECORI
pACS75	GST-lamin A (389-626)			BAMHI/ECORI
pACS73	GST-lamin A (389-609)			BAMHI/ECORI
pACS71	GST-lamin A (389-597)			BAMHI/ECORI
pACS37	GST-lamin A (506-646)			BAMHI/XHOI
pACS38	GST-Progerin (506-	(506-664 delta 50)		BAMHI/XHOI
pACS122	GST-lamin A (451-646)			BAMHI/ECORI
pACS124	GST-lamin A (551-646)			BAMHI/ECORI
pACS125	GST-lamin A C522A (389-646)			BAMHI/ECORI

## Sheet: Supplmentary File 1C
Supplementary File 1C: Antibodies used in this study
Target Antigen:		Company:		Catalog #		RRID:		Concentration:
DPF2		Proteintech		12111-1-AP		AB_2095574		1:500
GSG2		Invitrogen		PA5-55608		AB_2642243		1:500
Histone H2A		Abcam		AB18255		AB_470265		1:250
Histone H2B		Abcam		AB1790		AB_302612		1:1000
Histone H3		Abcam		AB1791		AB_302613		1:5000
Histone H4		Abcam		AB16254				1:1000
KPNA2		Invitrogen		PA5-83544		AB_2790697		1:250
Lamin A/C		SantaCruz		SC-376248		AB_10991536		1:1000
Lamin B1		SantaCruz		SC-6217		AB_648158		1:500
Lamin B1		Abcam		AB16048		AB_443298		1:1000
MOZ		Invitrogen		PA5-66742		AB_2664289		1:1000
PCAF		Invitrogen		PA5-120022		AB_2913594		1:1000
PHF6		Invitrogen		PA5-51501		AB_2645498		1:500
RNF168		Invitrogen		PA5-65427		AB_2664000		1:1000

## Sheet: Supplmentary File 1D
Supplementary File 1D: Fibroblast shape Z-score, raw score, area and perimenter measurements
FIGURE 1:	Circularity	Circularity	Area	Perimeter		FIGURE S2:	Circularity	Circularity	Area	Perimeter		FIGURE 6		Circularity	Area	Perimeter
Gene	Z-score	Raw score	Raw score	Raw score		Gene	Z-score	Raw score	Raw score	Raw score		Plasmid	Z-score	Raw score	Raw score	Raw score
CHMP4B	-13	0.866414	158.373	47.9273		SGOL1	-34.28	0.721939	187.313	57.1003		WT-H3.3-V5		0.945811	217.597	53.7687
LMNA	-9.65	0.875926	173.811	49.9355		AURKB	-19.96	0.826659	233.236	59.5442		H3.3K9M-V5		0.912426	204.351	53.0511
SMC2	-7.34	0.890658	195.898	52.5732		MAD2L1	-19.47	0.778488	270.852	66.1218		H3.3K27M-V5		0.921795	204.322	52.777
PCGF1	-6.74	0.918788	207.605	53.2864		CDC2	-16.68	0.848471	186.806	52.5995		H3.3K36M-V5		0.905422	187.453	51.0065
CHD8	-5.45	0.926215	152.092	45.4257		BUB1B	-15.43	0.851528	233.374	58.6856
MYST3	-5.24	0.925495	205.52	52.8257		AURKA	-13.53	0.862624	210.496	55.3753
FAM105A	-4.95	0.915741	222.165	55.2149		CHEK1	-9.77	0.895972	207.001	53.8821
RNF168	-4.76	0.926337	158.113	46.3131		DDX24	-3.79	0.93013	199.89	51.9672
PSMA4	-4.71	0.922199	188.871	50.7313		RAD21	-3.77	0.920926	186.757	50.4814
EYA1	-4.6	0.928451	191.303	50.8846		PCNA	-3.44	0.935406	253.627	58.3718
ABI3	-4.43	0.929098	180.418	49.3985
PNKP	-4.36	0.923227	206.165	52.9735
RSF1	-4.25	0.928893	179.559	49.2862
NUP205	-3.8	0.929557	238.551	56.7881
SMC4	-3.74	0.923659	195.898	51.6254
PPARGC1A	-3.68	0.933628	173.145	48.275
AFF1	-3.67	0.936185	162.858	46.7551
SETD2	-3.44	0.940971	163.451	46.7209
PTER	-3.34	0.93591	205.27	52.499
SHPRH	-3.25	0.940142	176.043	48.5085
ITGAM	-3.21	0.934311	233.385	56.0268
ASXL3	-3.17	0.939776	177.728	48.7495
KDM4D	-3.16	0.942265	186.569	49.8813
LPCAT2	-2.89	0.934467	200.458	51.92
MFAP1	-2.72	0.936523	214.979	53.7086
PIAS4	-2.57	0.944331	178.58	48.7483
ARRB1	-2.55	0.939075	172.895	48.1002
TDRD5	-2.51	0.942144	179.236	48.8944
DOLK	-2.42	0.947821	171.813	47.7276
PHC3	-2.39	0.937835	229.986	55.5127
NCOR1	-2.38	0.946483	150.722	44.734
GOSR2	-2.37	0.938922	193.715	50.9181
AIRE	-2.36	0.932465	216.317	53.9926
USP21	-2.31	0.946133	165.748	46.9194
ATAD2	-2.24	0.948503	164.718	46.715
ING2	-2.23	0.947479	174.504	48.1086
CHD1L	-2.14	0.948531	214.499	53.3079
HDAC10	-1.81	0.94655	163.635	46.6092
TRIM66	-1.74	0.950902	187.905	49.8317
EVI1	-1.72	0.94545	177.314	48.5465
PHF15	-1.72	0.95252	171.371	47.5485
CHAF1B	-1.66	0.94625	217.286	53.7178
