# Supplementary material for: Identification of epigenetic modulators as determinants of nuclear size and shape
Source: eLife. 2023 May 23;12:e80653. doi: 10.7554/eLife.80653 (PMC10259489; doi:10.7554/eLife.80653)
Supplement: Supplementary file 2. — (A) lists hits altering nuclear shape in fibroblast cells. (B) is a list of hits resulting in lower lamin A/C expression. (C) is a list of hits resulting in lowered lamin B1 expression. [file elife-80653-supp2.xlsx]

## Sheet: Supplementary File 2A
Supplementary File 2A: Nuclear Shape Hits - FIBROBLASTS
Gene	Function							Gene	Function
CHMP4B	Component of ESCRT; membrane remodeler							ASXL3	Additional Sex Combs Like 3, Transcriptional Regulator/Polycomb group (PcG)
LMNA	Component of Nuclear Lamina							KDM4D	Histone Demethylase specifically targets H3K9me3
SMC2	Central component of the condensin complex							LPCAT2	member of the lysophospholipid acyltransferase family
PCGF1	Component of a Polycomb group (PcG) multiprotein PRC1-like complex/ H2Aub/H3K9me3							MFAP1	Component of the elastin-associated microfibrils
CHD8	transcription repressor/remodels chromatin structure and recruiting histone H1							PIAS4	E3 SUMO ligase, sumolyates RNF168
MYST3	H3K9 acetyltransferase							ARRB1	Members of arrestin/beta-arrestin protein family
FAM105A	Inactive ubiquitin thioesterase FAM105A							TDRD5	Tudor Domain Containing 5 Protein
RNF168	Ubiquitinates H2A and H2AX							DOLK	required in the synthesis of N-linked and O-linked oligosaccharides
PSMA4	Proteosome Subunit Alpha 4							PHC3	Component of a Polycomb group (PcG) multiprotein PRC1-like complex/ H2Aub/H3K9me3
EYA1	Tyrosine phosphatase that dephosphorylates Tyr-142 of histone H2AX (H2AXY142ph)							NCOR1	Histone Deacetylase H3K9ac
ABI3	components of the Abi/WAVE complex which regulates actin polymerization							GOSR2	a trafficking membrane protein
PNKP	Polynucleotide Kinase 3'-Phosphatase							AIRE	transcriptional regulator that forms nuclear bodies
RSF1	Associates with Swi/Snf							USP21	Deubiquitinates histone H2A
NUP205	Nuclear pore complex protein 205							ATAD2	Binds to PCAF/Reads H3K14ac
SMC4	Central component of the condensin complex							ING2	Inhibitor Of Growth Family Member 2
PPARGC1A	Peroxisome proliferator-activated receptor gamma coactivator 1-alpha							CHD1L	Chromodomain Helicase DNA Binding Protein 1-Like
AFF1	a member of the AF4/ lymphoid nuclear protein							HDAC10	Histone Deacetylase 10
SETD2	H3K36me3 lysine methyltransferase							TRIM66	May function as transcription repressor
PTER	Phosphotriesterase Related							EVI1	Transcription factor, binds to the LMNA locus, mutated in a subset of myeloid leukemia patients
SHPRH	E3 ubiquitin ligase, ubiquitinates PCNA							PHF15	Component of the HBO1 complex/ H4 acetyltransferase
ITGAM	integrin alpha M chain							CHAF1B	Chromatin assembly factor I (CAF-I)

## Sheet: Supplementary File 2B
Supplementary File 2B: LMNA Expression Hits - FIBROBLAST
Gene	Function
LMNA	Component of Nuclear Lamina
C2orf34	Lysine methyltransferase
KDM4B	Lysine Demethylase
ACTB	Beta-actin
NUP88	Component of the Nuclear Pore
MYST3	H3K9 acetyltransferase
EP300	Histone acetyltransferase
NSD1	Histone Lysine Methyltransferase
CENPB	Centromeric Protein
EVI1	Transcription factor, mutated in a subset of myeloid leukemia patients
SMARCD3	Component of nucleosome remodeling complex
CBX7	Component of a Polycomb group (PcG) multiprotein PRC1-like complex

## Sheet: Supplementary File 2C
Supplementary File 2C: LMNB1 Expression Hits - FIBROBLAST
Gene	Function
LMNB1	Component of Nuclear Lamina
NUP88	Component of the Nuclear Pore
EP300	Histone acetyltransferase
PCGF6	Component of a Polycomb group (PcG) multiprotein PRC1-like complex
ERLIN2	Mediates the endoplasmic reticulum-associated degradation (ERAD)
TADA3	Component of the PCAF complex
MYST3	Histone acetyltransferase
UIMC1	Ubiquitin-binding protein
SMARCC1	SWI/SNF Complex Subunit
SMARCA4	Component of the CREST-BRG1 complex
ERCC5	Single-stranded structure-specific DNA endonuclease involved in DNA excision repair
PSMA4	Component of the 20S core proteasome complex
JMJD7	Jumonji domain containing protein
BRWD1	Bromodomain and WD repeat-containing protein
TDRD10	Tudor domain containing protein
