# Supplementary material for: Identification of epigenetic modulators as determinants of nuclear size and shape
Source: eLife. 2023 May 23;12:e80653. doi: 10.7554/eLife.80653 (PMC10259489; doi:10.7554/eLife.80653)
Supplement: Supplementary file 3. — (A) lists validation results for the nuclear shape screen in fibroblast cells. (B) lists validation results for hits increasing nuclear size in fibroblast cells. (C) lists validation results for hits decreasing nuclear size in fibroblast cells. (D) identifies nuclear shape hits in MCF10AT cells. (E) lists lamin A interacting peptides. [file elife-80653-supp3.xlsx]

## Sheet: Supplementary File 3A
Supplementary File 3A: Validation of fibroblast nuclear shape hits
Gene	Roundness Z-Score	Roundness Z-score SD	Cell Number Z-score
CHMP4B	-11.181	0.855312	6.79915
LMNA	-16.2938	0.742754	9.94284
SMC2	-4.29138	0.811875	-0.310771
PCGF1	-3.41434	0.435182	-3.99477
CHD8	-16.9294	1.43002	-2.91367
MYST3	N/A	N/A	N/A
FAM105A	-9.45932	0.0624059	4.50272
RNF168	-10.1812	1.01155	-1.07171
PSMA4	-1.97854	0.37147	2.74321
EYA1	-4.16424	0.628869	3.52481
ABI3	-7.16	0.314861	3.50412
PNKP	-7.86803	0.847547	7.06762
RSF1	-4.55749	0.421072	5.88681
NUP205	-11.3054	2.23179	-0.424275
SMC4	-14.0635	1.84572	-3.48524
PPARGC1A	-3.94763	0.701145	-2.72779
AFF1	-6.02352	0.731094	3.96206
SETD2	-3.31264	0.576712	1.36947
PTER	-6.80543	0.543203	6.82333
SHPRH	-5.15892	0.263916	-2.02194
ITGAM	-9.90214	2.80091	-2.28356
ASXL3	-2.24044	0.721549	-0.279701
KDM4D	-7.92786	0.0870118	-1.4675
LPCAT2	-1.86093	0.791684	-0.531144
MFAP1	-2.73505	0.342577	-0.840982
PIAS4	-1.3223	0.495218	0.0508283
ARRB1	-12.9171	1.46609	0.904775
TDRD5	-6.37838	0.368937	4.74011
DOLK	-3.38251	0.139358	5.30833
PHC3	-1.34863	0.320712	-3.64022
NCOR1	-1.46421	0.449134	-0.785854
GOSR2	-3.6307	0.0987563	3.6832
AIRE	-1.75222	1.11364	-1.78434
USP21	-8.68135	0.455797	1.37635
ATAD2	-1.94064	1.12654	0.85644
ING2	-2.23781	1.03897	-1.26794
CHD1L	-2.80728	0.882089	1.47272
HDAC10	-7.66105	1.45244	0.309025
TRIM66	-4.4886	0.283042	3.69015
EVI1	N/A	N/A	N/A
PHF15	N/A	N/A	N/A
CHAF1B	-8.4581	0.240556	-4.16001

## Sheet: Supplementary File 3B
Supplementary File 3B: Validation of fibroblast increased nuclear size hits
Gene	Area Z-Score	Area Z-score SD	Cell Number Z-score
CHAF1A	5.29189	3.07189	-2.2044
SUPT7L	0.293427	1.09302	2.23372
TTK	N/A	N/A	N/A
NUP205	5.73188	2.18093	-0.424275
NUP62	3.66154	2.90552	0.725614
BRDT	2.03046	0.583234	-4.00855
DDB1	8.70561	2.10599	-2.06669
SLU7	14.0876	3.85971	-1.48826
ERGIC1	12.1831	1.58114	-1.12689
NUPL1	N/A	N/A	N/A
NUP85	2.986	1.24283	0.119604
SYNE1	-0.193143	0.600074	5.33237
SLC35B1	7.29694	1.82037	-2.10121
PRDM14	0.00737334	0.888243	3.95173
CWF19L2	1.31772	0.896415	1.45552
PHF5A	4.63235	1.99665	2.15804
MCM5	2.25465	1.13342	-2.8345
RAD21L1	5.46633	0.24914	-3.26489
STK31	3.4963	1.00101	-0.541394
PRMT2	1.18767	2.81008	1.8826
VRK1	2.19735	3.33789	3.15314
CHMP6	0.917416	1.17878	1.44505
XPO1	4.79221	2.45765	0.574156
MBD2	2.50635	1.18771	-0.13171
KMT2E	4.9682	2.58151	-2.51768
SSRP1	N/A	N/A	N/A
SLC27A3	4.49298	1.05159	-1.93593
HR	2.97066	0.840828	-0.0904286
SMNDC1	7.53938	1.94928	-0.0765917
TDRD9	8.32138	1.99415	-3.27181
ARID4B	8.68785	4.82331	-1.68107
ZNF276	-2.7251	0.850035	-0.817045
C6orf134	N/A	N/A	N/A
MUM1	5.02013	2.29655	-0.207429
SUDS3	4.02623	0.650373	-0.272897
FA2H	-0.375918	0.498327	-1.991

## Sheet: Supplementary File 3C
Supplementary File 3C: Validation of fibroblast decreased nuclear size hits
Gene	Area Z-Score	Area Z-score SD	Cell Number Z-score
PHF10	-2.6342	0.932505	7.14332
RAI1	-0.254535	1.34816	0.83578
STX5	-4.58261	1.71096	-0.469092
SIRT4	-2.94425	0.31782	3.2529
CKAP4	0.268255	0.695056	-1.8154
BANF2	N/A	N/A	N/A
ITGAX	-2.80222	0.435796	1.02516
MAPRE2	-2.89452	0.350347	4.08255
BRD2	-2.09174	0.87024	-1.44702
VMA21	-3.41434	0.0562556	-0.52426
SMC1B	-1.40888	0.25705	1.76876
MLLT10	0.328168	0.0552372	4.05848
SIRT7	8.12707	3.79489	-1.22661
EYA3	-1.21646	0.744738	3.9622

## Sheet: Supplementary File 3D
Supplementary File 3D: Nuclear shape hits - MCF10AT
Nuclear Roundness Hits MCF10AT:
Gene	Function							Gene	Function
TMEM48	Component of the nuclear pore complex (NPC)							METTL21C	Protein-lysine methyltransferase METTL21C
SKP1	Component of the SCF (SKP1-CUL1-F-box protein) ubiquitin ligase complex							WAPAL	Regulator of sister chromatid cohesion in mitosis
DPF2	Zinc finger protein							EYA1	Tyrosine phosphatase that dephosphorylates Tyr-142 of histone H2AX (H2AXY142ph)
GSG2	Serine/threonine-protein kinase that phosphorylates histone H3T3							EP300	Histone acetyltransferase
TMEM19	Transmembrane protein 19							BRD8	Component of the NuA4 histone acetyltransferase (HAT) complex
KAT2B	Histone Acetyltransferase (PCAF)							GTF2F1	TFIIF is a general transcription initiation factor that binds to RNA polymerase II
JMJD7	Jumonji domain-containing protein 7							SUDS3	Sin3 histone deacetylase corepressor complex component SDS3
RAD21L1	Double-strand-break repair protein rad21-like protein 1							CHMP7	ESCRT-III-like protein required to recruit the ESCRT-III complex to the nuclear envelope
KPNA2	Importin subunit alpha-1							DULLARD	Serine/threonine protein phosphatase
PHF6	PHD finger protein 6							TMEM86B	Enzyme catalyzing the degradation of lysoplasmalogen
PHF20	Component of the MOF histone acetyltransferase protein complex							TAF3	factors required for accurate and regulated initiation by RNA polymerase II
LMNA	Component of Nuclear Lamina							TRIM66	transcription repressor; The repressive effects are mediated, at least in part, by recruitment of deacetylase activity
RANBP2	E3 SUMO-protein ligase							CDY2A	Testis-specific chromodomain protein Y 2
ORC1L	Component of the origin recognition complex (ORC)							C17orf79	Histone-binding protein required for histone H4 methyltransferase activity of PRMT5
NUP155	Component of the nuclear pore complex (NPC)
BANF1	Plays a role in nuclear assembly, chromatin organization, and gene expression
AAAS	Plays a role in the development of the peripheral and central nervous system
JAGN1	Endoplasmic reticulum transmembrane protein involved in vesicle-mediated transport
HLTF	Functions both as a helicase and E3 ubiquitin ligase
NUP93	Facilitates nuclear pore complex (NPC) assembly and/or maintenance

## Sheet: Supplementary File 3E
Supplementary File 3E: Top Lamin A interacting peptides
Rank	Name	Mod 1	Mod 2	Mod 3	Mod 4	Intensity
1	H3 1-19	R2me2a	T3P	K4me3		0.850379
2	H3 1-19	R8me2s	K9me2			0.616692
3	H3 16-35	R26me2s	K27me2			0.603035
4	H4 11-30	R19me2s	K20me1			0.59393
5	H3 1-19	R2me2s	K4me3			0.548407
6	H3 1-19	R2me2a	K4me1			0.514112
7	H4 11-30	K12ac	K16ac			0.495903
8	H3 1-19	R2me2a	K4me1	R8me2s	K9me2	0.448862
9	H3 1-19	R2me2a	K4me1	K9ac		0.443399
10	H3 1-19	K9me2				0.433384
11	H4 11-30	K16ac	R17me2s			0.415174
12	H3 16-35	K27ac				0.41305
13	H3 1-19	R2me2a	K4ac	R8me2s	K9me2	0.37481
14	H3 1-19	K4me1				0.366313
15	H3 16-35	R26me2a	K27ac			0.358725
16		Background 1				0.353869
17	H3 1-19	K4ac				0.349621
18	H3 1-19	R2me2s	K4me1			0.349014
19	H3 1-19	R2me2s	K4me2	R8me2s	K9me2	0.343854
20	H2b 1-19	K5ac	K12ac	K15ac		0.343551
21	H3 1-19	K4me2	R8me2s	K9me3		0.325038
22	H3 1-19	T3P				0.296813
23	H3 1-19	R2me2s	K4me1	R8me2s	K9me2	0.285584
24	H3 1-19	R2me2a	K4me2	R8me2s	K9me2	0.284067
25	H3 1-19	R2me2a	T3P	K4me2		0.282853
